# Supplementary material
Source: HighWire-hosted journal article supplement (https://www.annfammed.org/highwire/filestream/12996/field_highwire_adjunct_files/0/naimer-inno-Supp_Figures.pdf)

Supplemental materials for:

Naimer SA. Body surface examination facilitated by digital microscopy. *Ann Fam Med*. 2020;18(2):181.

Supplemental Figure 1. Digital microscope.

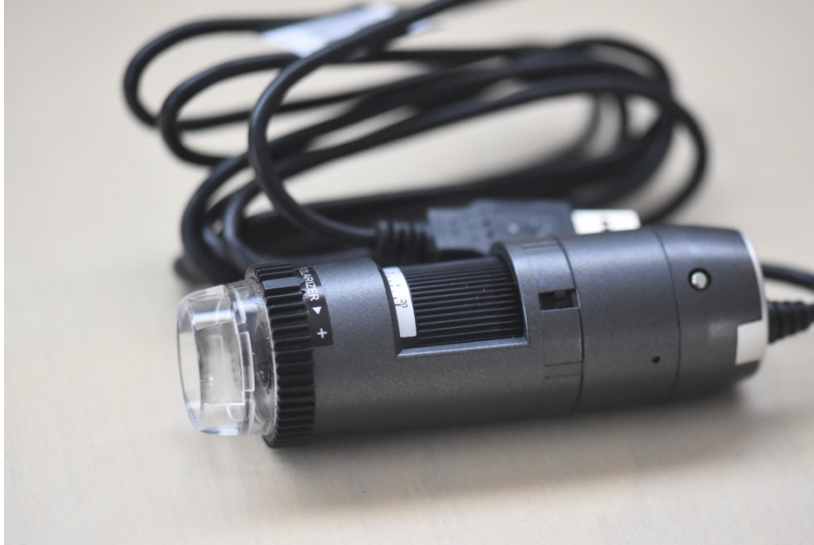

Supplemental Figure 2. Plantar lesion.

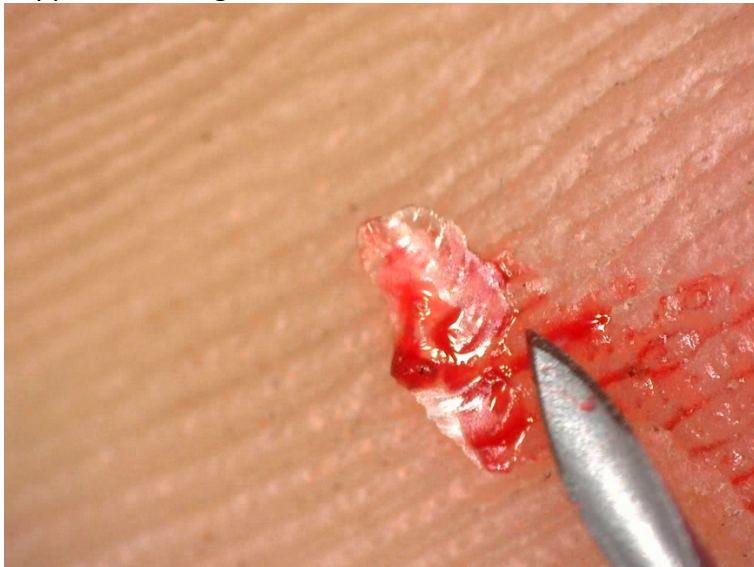

Supplement: naimer-inno-Supp_Figures.pdf [file naimer-inno-Supp_Figures.pdf]
